# Supplementary material for: Deciding What to Save
Source: MDPI journal article supplement (doi:10.3390/ijms232416000), 1982-08-01
Supplement: s1 [file s1]

**Table S1.** Targets of RPE components.

| Gene name       | Protein name                                     | Compounds                                          |
|-----------------|--------------------------------------------------|----------------------------------------------------|
| <i>ACTA2</i>    | Actin, aortic smooth muscle                      | Emodin                                             |
| <i>ALR</i>      | Aldose reductase                                 | Aloe-emodin, Rhein                                 |
| <i>BAX</i>      | Apoptosis regulator BAX                          | Aloe-emodin                                        |
| <i>BTX</i>      | Tyrosine-protein kinase BTK                      | Emodin                                             |
| <i>CALM</i>     | Calmodulin                                       | Chrysophanol, Emodin, Physcion                     |
| <i>CASP3</i>    | Caspase-3                                        | Aloe-emodin, Emodin                                |
| <i>CCNB1</i>    | G2/mitotic-specific cyclin-B1                    | Aloe-emodin                                        |
| <i>CDC2A</i>    | Cell division control protein 2 homolog          | Aloe-emodin                                        |
| <i>CDKN1A</i>   | Cyclin-dependent kinase inhibitor 1A             | Aloe-emodin, Emodin                                |
| <i>CYP1A1</i>   | Cytochrome P450 1A1                              | Emodin                                             |
| <i>EGF</i>      | Pro-epidermal growth factor                      | Emodin                                             |
| <i>EIF6</i>     | Eukaryotic translation initiation factor 6       | Aloe-emodin                                        |
| <i>F10</i>      | Coagulation factor Xa                            | Emodin, Physcion                                   |
| <i>F7</i>       | Coagulation factor VII                           | Emodin, Physcion                                   |
| <i>FASN</i>     | Fatty acid synthase                              | Aloe-emodin                                        |
| <i>GABRA1</i>   | Gamma-aminobutyric acid receptor subunit alpha-1 | Chrysophanol                                       |
| <i>GM-CSF</i>   | Granulocyte-macrophage colony-stimulating factor | Emodin                                             |
| <i>HSP90AA1</i> | Heat shock protein HSP 90                        | Aloe-emodin, Chrysophanol, Emodin, Physcion, Rhein |
| <i>IGHG1</i>    | Ig gamma-1 chain C region                        | Aloe-emodin, Chrysophanol, Emodin, Physcion        |
| <i>IL1B</i>     | Interleukin-1 beta                               | Aloe-emodin, Emodin                                |
| <i>JUN</i>      | Transcription factor AP-1                        | Rhein                                              |
| <i>MAOB</i>     | Amine oxidase [flavin-containing] B              | Emodin                                             |
| <i>MMP1</i>     | Interstitial collagenase                         | Emodin                                             |
| <i>MMP9</i>     | Matrix metalloproteinase-9                       | Emodin                                             |

|               |                                                                                 |                                                    |
|---------------|---------------------------------------------------------------------------------|----------------------------------------------------|
| <i>MYC</i>    | Myc proto-oncogene protein                                                      | Aloe-emodin, Emodin                                |
| <i>NCOA1</i>  | Nuclear receptor coactivator 1                                                  | Emodin, Physcion                                   |
| <i>NCOA2</i>  | Nuclear receptor coactivator 2                                                  | Aloe-emodin, Chrysophanol, Emodin, Physcion, Rhein |
| <i>NOS3</i>   | Nitric-oxide synthase, endothelial                                              | Physcion                                           |
| <i>PCNA</i>   | Proliferating cell nuclear antigen                                              | Aloe-emodin                                        |
| <i>PDE3A</i>  | CGMP-inhibited 3',5'-cyclic phosphodiesterase A                                 | Chrysophanol                                       |
| <i>PIK3CG</i> | Phosphatidylinositol-4,5-bisphosphate 3-kinase catalytic subunit, gamma isoform | Aloe-emodin, Chrysophanol, Emodin, Physcion, Rhein |
| <i>PKIA</i>   | cAMP-dependent protein kinase inhibitor alpha                                   | Aloe-emodin, Chrysophanol, Physcion                |
| <i>PPARG</i>  | Peroxisome proliferator-activated receptor gamma                                | Emodin                                             |
| <i>PRKACA</i> | mRNA of PKA Catalytic Subunit C-alpha                                           | Aloe-emodin, Chrysophanol, Emodin, Physcion        |
| <i>PRKCA</i>  | Protein kinase C alpha type                                                     | Aloe-emodin                                        |
| <i>PRKCD</i>  | Protein kinase C delta type                                                     | Aloe-emodin, Emodin                                |
| <i>PRKCE</i>  | Protein kinase C epsilon type                                                   | Aloe-emodin, Emodin                                |
| <i>PTGS1</i>  | Prostaglandin G/H synthase 1                                                    | Aloe-emodin, Chrysophanol, Emodin, Physcion, Rhein |
| <i>PTGS2</i>  | Prostaglandin G/H synthase 2                                                    | Aloe-emodin, Chrysophanol, Emodin, Physcion, Rhein |
| <i>RXRΒ</i>   | Retinoic acid receptor RXR-alpha                                                | Physcion                                           |
| <i>SCN5A</i>  | Sodium channel protein type 5 subunit alpha                                     | Chrysophanol, Physcion                             |
| <i>SLC2A1</i> | Solute carrier family 2, facilitated glucose transporter member 1               | Emodin                                             |
| <i>SLC2A4</i> | Solute carrier family 2, facilitated glucose transporter member 4               | Emodin                                             |
| <i>TGFB1</i>  | Transforming growth factor beta-1                                               | Emodin                                             |
| <i>TNF</i>    | Tumor necrosis factor                                                           | Aloe-emodin, Emodin                                |
| <i>TOP2A</i>  | DNA topoisomerase II                                                            | Emodin, Physcion                                   |
| <i>TP53</i>   | Cellular tumor antigen p53                                                      | Aloe-emodin, Emodin                                |
| <i>VEGFR1</i> | Vascular endothelial growth factor receptor 1                                   | Emodin                                             |
| <i>VEGFR2</i> | Vascular endothelial growth factor receptor 2                                   | Emodin                                             |
| <i>VEGFR3</i> | Vascular endothelial growth factor receptor 3                                   | Emodin                                             |

---

**Table S2.** GO functional enrichment analysis on potential targets of RPE components.

| Category              | GO term                                                             | Related genes                                                                     |
|-----------------------|---------------------------------------------------------------------|-----------------------------------------------------------------------------------|
| Biological<br>Process | Positive regulation of pri-miRNA transcription by RNA polymerase II | <i>JUN, PPARG, TGFB1, TNF, TP53</i>                                               |
|                       | Cellular response to cytokine stimulus                              | <i>CASP3, CDKN1A, HSP90AA1, IL1B, MMP9, PTGS2, TGFB1, TNF, TP53</i>               |
|                       | Positive regulation of cellular metabolic process                   | <i>CCNB1, CDKN1A, EGF, PPARG, TGFB1, TP53</i>                                     |
|                       | Regulation of pri-miRNA transcription by RNA polymerase II          | <i>JUN, PPARG, TGFB1, TNF, TP53</i>                                               |
|                       | Regulation of DNA binding                                           | <i>EGF, JUN, MMP9, PPARG, TGFB1</i>                                               |
|                       | Positive regulation of protein phosphorylation                      | <i>CDKN1A, EGF, HSP90AA1, IL1B, MMP9, TGFB1, TNF, TP53</i>                        |
|                       | Regulation of neuroinflammatory response                            | <i>IL1B, MMP9, PTGS2, TNF</i>                                                     |
|                       | Cytokine-mediated signaling pathway                                 | <i>CASP3, CDKN1A, HSP90AA1, IL1B, MMP9, PTGS2, TGFB1, TNF, TP53</i>               |
|                       | Regulation of fever generation                                      | <i>IL1B, PTGS2, TNF</i>                                                           |
|                       | Positive regulation of heat generation                              | <i>IL1B, PTGS2, TNF</i>                                                           |
| Cellular<br>Component | Cyclin-dependent protein kinase holoenzyme complex                  | <i>CCNB1, CDKN1A</i>                                                              |
|                       | Serine/threonine protein kinase complex                             | <i>CCNB1, CDKN1A</i>                                                              |
|                       | Intracellular organelle lumen                                       | <i>CCNB1, HSP90AA1, MMP9, PTGS2, TGFB1</i>                                        |
|                       | Platelet alpha granule lumen                                        | <i>EGF, TGFB1</i>                                                                 |
|                       | Actin-based cell projection                                         | <i>ACTA2, TGFB1</i>                                                               |
|                       | Platelet alpha granule                                              | <i>EGF, TGFB1</i>                                                                 |
|                       | Secretory granule lumen                                             | <i>EGF, HSP90AA1, TGFB1</i>                                                       |
|                       | Phosphatidylinositol 3-kinase complex, class I                      | <i>PIK3CG</i>                                                                     |
|                       | Intracellular membrane-bounded organelle                            | <i>CASP3, CCNB1, CDKN1A, JUN, HSP90AA1, NOS3, PCNA, PPARG, PTGS1, TGFB1, TP53</i> |
|                       | Nucleus                                                             | <i>CASP3, CCNB1, CDKN1A, JUN, HSP90AA1, NOS3, PCNA, PPARG, TGFB1, TP53</i>        |

|                       |                                                      |                                             |
|-----------------------|------------------------------------------------------|---------------------------------------------|
| Molecular<br>Function | Ubiquitin-like protein ligase binding                | <i>CCNB1, CDKN1A, JUN, HSP90AA1, TP53</i>   |
|                       | Protein tyrosine kinase binding                      | <i>HSP90AA1, PCNA, TP53</i>                 |
|                       | Transcription regulatory region nucleic acid binding | <i>JUN, PPARG, TNF, TP53</i>                |
|                       | Protein kinase binding                               | <i>ACTA2, CCNB1, CDKN1A, HSP90AA1, TP53</i> |
|                       | Ubiquitin protein ligase binding                     | <i>CDKN1A, HSP90AA1, JUN, TP53</i>          |
|                       | DNA polymerase binding                               | <i>HSP90AA1, PCNA</i>                       |
|                       | Histone acetyltransferase binding                    | <i>PCNA, TP53</i>                           |
|                       | Receptor ligand activity                             | <i>EGF, IL1B, TGFB1, TNF</i>                |
|                       | Disordered domain specific binding                   | <i>HSP90AA1, TP53</i>                       |
|                       | Cytokine activity                                    | <i>IL1B, TGFB1, TNF</i>                     |

**Table S3.** KEGG enrichment analysis on potential targets of RPE components.

| KEGG pathway                           | Related genes                                       |
|----------------------------------------|-----------------------------------------------------|
| IL-17 signaling pathway                | <i>CASP3, HSP90AA1, IL1B, JUN, MMP9, PTGS2, TNF</i> |
| TNF signaling pathway                  | <i>CASP3, IL1B, JUN, MMP9, PTGS2, TNF</i>           |
| MAPK signaling pathway                 | <i>CASP3, EGF, IL1B, JUN, TGFB1, TNF, TP53</i>      |
| Cell cycle                             | <i>CCNB1, CDKN1A, PCNA, TGFB1, TP53</i>             |
| Th17 differentiation                   | <i>HSP90AA1, IL1B, JUN, TGFB1</i>                   |
| NF-kappa B signaling pathway           | <i>IL1B, PTGS2, TNF</i>                             |
| VEGF signaling                         | <i>NOS3, PTGS2</i>                                  |
| Cytokine-cytokine receptor interaction | <i>IL1B, TGFB1, TNF</i>                             |
| TGF-beta signaling pathway             | <i>TGFB1, TNF</i>                                   |
| JAK-STAT signaling pathway             | <i>CDKN1A, EGF</i>                                  |
